# Supplementary material
Source: Springer Nature journal article supplement (https://www.springermedizin.de/resource/supplementary/13229_2013_70_MOESM5_ESM.pdf/9676102)

**a**

Mean response times (milliseconds)

4500  
4000  
3500  
3000  
2500  
2000

■ Congruent    ▨ Incongruent

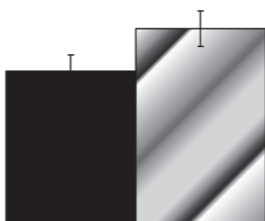**b**

Mean response times (milliseconds)

4500  
4000  
3500  
3000  
2500  
2000

■ ASD    □ TD

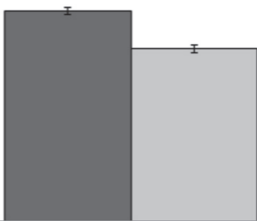

Supplement: MOESM5 [file 9676102]
